# Supplementary material
Source: publisher figshare collection journal article supplement (https://gsajournals.figshare.com/ndownloader/files/17907260)
Supplement: Supplementary file 1 [file 17907260]

## Sheet: Table S1
Table S1. Details of the 143 diverse wheat acessions under the study.
2017ENTRY#	genotype label	GroupUPGMA	GroupName	CountryofOrigin	VARIETY/LINE	Origin country	18NURSERY	18ENTRY	2017NURSERY	PLOT_Rep1	PLOT_Rep2	PLOT_Rep3	PLOT_Rep4	VARIETY/LINE	Cross ID	Selection History	Origin country	2016NURSERY	2016ENTRY
2	87	2	CIMMYT	Turkey	UKR-OD 1530.94/AE.SQUARROSA(629)	MX-TCI	18OMON-UNL	87	17OMON-GAI	161	226	463	593	UKR-OD 1530.94/AE.SQUARROSA(629)	CAWW04GH00076S	-0GH-0SE-030E-3E-0E-1YA-0YM	MX-TCI	16SYNT-PYT-OMSK	2
3	62	2	CIMMYT	Turkey	UKR-OD 952.92/AE.SQUARROSA(1031)	MX-TCI	18OMON-UNL	62	17OMON-GAI	104	256	371	562	UKR-OD 952.92/AE.SQUARROSA(1031)	CAWW04GH00061S	-0GH-0SE-030E-15E-0E-1YA-0YM	MX-TCI	16SYNT-PYT-OMSK	3
4	101	2	CIMMYT	Turkey	UKR-OD 1530.94/AE.SQUARROSA(310)	MX-TCI	18OMON-UNL	101	17OMON-GAI	144	220	402	609	UKR-OD 1530.94/AE.SQUARROSA(310)	CAWW04GH00068S	-0GH-0SE-030E-12E-0E-1YA-0YM	MX-TCI	16SYNT-PYT-OMSK	4
5	95	1	Japan	Japan	LANGDON/KU-2096	JAP	18OMON-UNL	95	17OMON-GAI	122	254	429	602	LANGDON/KU-2096			JAP	16SYNT-PYT-OMSK	5
6	23	2	CIMMYT	Turkey	UKR-OD 1530.94/AE.SQUARROSA(458)	MX-TCI	18OMON-UNL	23	17OMON-GAI	62	316	374	520	UKR-OD 1530.94/AE.SQUARROSA(458)	CAWW04GH00074S	-0GH-0SE-030E-12E-0E-1YA-0YM	MX-TCI	16SYNT-PYT-OMSK	10
7	106	2	CIMMYT	Turkey	UKR-OD 952.92/AE.SQUARROSA(1031)	MX-TCI	18OMON-UNL	106	17OMON-GAI	108	247	396	615	UKR-OD 952.92/AE.SQUARROSA(1031)	CAWW04GH00061S	-0GH-0SE-030E-18E-0E-1YA-0YM	MX-TCI	16SYNT-PYT-OMSK	11
9	67	2	CIMMYT	Turkey	UKR-OD 952.92/AE.SQUARROSA(1031)	MX-TCI	18OMON-UNL	67	17OMON-GAI	50	312	444	567	UKR-OD 952.92/AE.SQUARROSA(1031)	CAWW04GH00061S	-0GH-0SE-030E-16E-0E-1YA-0YM	MX-TCI	16SYNT-PYT-OMSK	17
11	110	4	KASIB	Russia	Serebristaya	Russia	18OMON-UNL	110	17OMON-GAI	111	200	409	619	Serebristaya			Russia	CHECK-2
12	118	2	CIMMYT	Turkey	AISBERG/AE.SQUARROSA(511)	MX-TCI	18OMON-UNL	118	17OMON-GAI	153	239	478	627	AISBERG/AE.SQUARROSA(511)	CAWW04GH00005S	-0GH-0SE-030E-2E-0E-1YA-0YM	MX-TCI	16SYNT-PYT-OMSK	23
13	112	2	CIMMYT	Turkey	UKR-OD 1530.94/AE.SQUARROSA(392)	MX-TCI	18OMON-UNL	112	17OMON-GAI	73	221	426	621	UKR-OD 1530.94/AE.SQUARROSA(392)	CAWW04GH00071S	-0GH-0SE-030E-6E-0E-1YA-0YM	MX-TCI	16SYNT-PYT-OMSK	30
14	51	1	Japan	Japan	LANGDON/KU-2075	JAP	18OMON-UNL	51	17OMON-GAI	158	205	492	551	LANGDON/KU-2075			JAP	16SYNT-PYT-OMSK	32
16	81	2	CIMMYT	Turkey	UKR-OD 1530.94/AE.SQUARROSA(458)	MX-TCI	18OMON-UNL	81	17OMON-GAI	15	195	401	586	UKR-OD 1530.94/AE.SQUARROSA(458)	CAWW04GH00074S	-0GH-0SE-030E-15E-0E-1YA-0YM	MX-TCI	16SYNT-PYT-OMSK	45
18	28	2	CIMMYT	Turkey	AISBERG/AE.SQUARROSA(369)	MX-TCI	18OMON-UNL	28	17OMON-GAI	4	218	380	525	AISBERG/AE.SQUARROSA(369)	CAWW04GH00003S	-0GH-0SE-030E-6E-0E-1YA-0YM	MX-TCI	16SYNT-PYT-OMSK	47
19	96	2	CIMMYT	Turkey	UKR-OD 1530.94/AE.SQUARROSA(1027)	MX-TCI	18OMON-UNL	96	17OMON-GAI	162	262	357	603	UKR-OD 1530.94/AE.SQUARROSA(1027)	CAWW04GH00078S	-0GH-0SE-030E-9E-0E-1YA-0YM	MX-TCI	16SYNT-PYT-OMSK	48
21	144	1	Japan	Japan	LANGDON/KU-20-9	JAP	18OMON-UNL	144	17OMON-GAI	17	328	421	654	LANGDON/KU-20-9			JAP	16SYNT-PYT-OMSK	50
22	150	1	Japan	Japan	LANGDON/IG 48042	JAP	18OMON-UNL	150	17OMON-GAI	56	264	343	660	LANGDON/IG 48042			JAP	16SYNT-PYT-OMSK	52
23	68	2	CIMMYT	Turkey	AISBERG/AE.SQUARROSA(511)	MX-TCI	18OMON-UNL	68	17OMON-GAI	164	319	332	568	AISBERG/AE.SQUARROSA(511)	CAWW04GH00005S	-0GH-0SE-030E-8E-0E-1YA-0YM	MX-TCI	16SYNT-PYT-OMSK	54
24	16	2	CIMMYT	Turkey	AISBERG/AE.SQUARROSA(511)	MX-TCI	18OMON-UNL	16	17OMON-GAI	16	206	392	511	AISBERG/AE.SQUARROSA(511)	CAWW04GH00005S	-0GH-0SE-030E-1E-0E-1YA-0YM	MX-TCI	16SYNT-PYT-OMSK	55
25	140	2	CIMMYT	Turkey	UKR-OD 1530.94/AE.SQUARROSA(458)	MX-TCI	18OMON-UNL	140	17OMON-GAI	149	280	342	650	UKR-OD 1530.94/AE.SQUARROSA(458)	CAWW04GH00074S	-0GH-0SE-030E-4E-0E-1YA-0YM	MX-TCI	16SYNT-PYT-OMSK	56
26	85	2	CIMMYT	Turkey	PANDUR/AE.SQUARROSA(223)	MX-TCI	18OMON-UNL	85	17OMON-GAI	35	267	390	590	PANDUR/AE.SQUARROSA(223)	CAWW04GH00079S	-0GH-0SE-030E-14E-0E-1YA-0YM	MX-TCI	16SYNT-PYT-OMSK	58
27	44	2	CIMMYT	Turkey	LEUC 84693/AE.SQUARROSA(409)	MX-TCI	18OMON-UNL	44	17OMON-GAI	130	274	428	543	LEUC 84693/AE.SQUARROSA(409)	CAWW04GH00010S	-0GH-0SE-030E-15E-0E-1YA-0YM	MX-TCI	16SYNT-PYT-OMSK	60
28	99	2	CIMMYT	Turkey	AISBERG/AE.SQUARROSA(369)	MX-TCI	18OMON-UNL	99	17OMON-GAI	61	327	347	606	AISBERG/AE.SQUARROSA(369)	CAWW04GH00003S	-0GH-0SE-030E-2E-0E-1YA-0YM	MX-TCI	16SYNT-PYT-OMSK	62
29	43	1	Japan	Japan	LANGDON/IG 126387	JAP	18OMON-UNL	43	17OMON-GAI	43	293	448	542	LANGDON/IG 126387			JAP	16SYNT-PYT-OMSK	64
31	6	2	CIMMYT	Turkey	AISBERG/AE.SQUARROSA(369)	MX-TCI	18OMON-UNL	6	17OMON-GAI	134	225	461	501	AISBERG/AE.SQUARROSA(369)	CAWW04GH00003S	-0GH-0SE-030E-18E-0E-2YA-0YM	MX-TCI	16SYNT-PYT-OMSK	67
32	113	2	CIMMYT	Turkey	AISBERG/AE.SQUARROSA(369)	MX-TCI	18OMON-UNL	113	17OMON-GAI	34	268	491	622	AISBERG/AE.SQUARROSA(369)	CAWW04GH00003S	-0GH-0SE-030E-18E-0E-3YA-0YM	MX-TCI	16SYNT-PYT-OMSK	68
33	46	2	CIMMYT	Turkey	UKR-OD 1530.94/AE.SQUARROSA(629)	MX-TCI	18OMON-UNL	46	17OMON-GAI	47	213	331	545	UKR-OD 1530.94/AE.SQUARROSA(629)	CAWW04GH00076S	-0GH-0SE-030E-11E-0E-1YA-0YM	MX-TCI	16SYNT-PYT-OMSK	69
34	54	1	Japan	Japan	LANGDON/KU-2097	JAP	18OMON-UNL	54	17OMON-GAI	138	175	368	554	LANGDON/KU-2097			JAP	16SYNT-PYT-OMSK	74
35	73	2	CIMMYT	Turkey	UKR-OD 1530.94/AE.SQUARROSA(629)	MX-TCI	18OMON-UNL	73	17OMON-GAI	106	295	453	573	UKR-OD 1530.94/AE.SQUARROSA(629)	CAWW04GH00076S	-0GH-0SE-030E-11E-0E-2YA-0YM	MX-TCI	16SYNT-PYT-OMSK	75
36	122	2	CIMMYT	Turkey	AISBERG/AE.SQUARROSA(369)//DEMIR	MX-TCI	18OMON-UNL	122	17OMON-GAI	83	278	375	631	AISBERG/AE.SQUARROSA(369)//DEMIR	TCI091254	-0SE-0E-8DYR-0E-1YA-0YM	MX-TCI	16SYNT-PYT-OMSK	76
37	130	2	CIMMYT	Turkey	UKR-OD 1530.94/AE.SQUARROSA(310)	MX-TCI	18OMON-UNL	130	17OMON-GAI	29	304	490	640	UKR-OD 1530.94/AE.SQUARROSA(310)	CAWW04GH00068S	-0GH-0SE-030E-18E-0E-1YA-0YM	MX-TCI	16SYNT-PYT-OMSK	77
38	131	2	CIMMYT	Turkey	AISBERG/AE.SQUARROSA(369)	MX-TCI	18OMON-UNL	131	17OMON-GAI	63	223	372	641	AISBERG/AE.SQUARROSA(369)	CAWW04GH00003S	-0GH-0SE-030E-2E-0E-2YA-0YM	MX-TCI	16SYNT-PYT-OMSK	78
39	10	2	CIMMYT	Turkey	UKR-OD 952.92/AE.SQUARROSA(1031)	MX-TCI	18OMON-UNL	10	17OMON-GAI	7	279	451	505	UKR-OD 952.92/AE.SQUARROSA(1031)	CAWW04GH00061S	-0GH-0SE-030E-6E-0E-1YA-0YM	MX-TCI	16SYNT-PYT-OMSK	86
41	137	2	CIMMYT	Turkey	UKR-OD 1530.94/AE.SQUARROSA(1027)	MX-TCI	18OMON-UNL	137	17OMON-GAI	71	269	460	647	UKR-OD 1530.94/AE.SQUARROSA(1027)	CAWW04GH00078S	-0GH-0SE-030E-17E-0E-1YA-0YM	MX-TCI	16SYNT-PYT-OMSK	90
42	31	2	CIMMYT	Turkey	UKR-OD 1530.94/AE.SQUARROSA(310)	MX-TCI	18OMON-UNL	31	17OMON-GAI	52	290	430	528	UKR-OD 1530.94/AE.SQUARROSA(310)	CAWW04GH00068S	-0GH-0SE-030E-6E-0E-1YA-0YM	MX-TCI	16SYNT-PYT-OMSK	94
43	25	2	CIMMYT	Turkey	UKR-OD 952.92/AE.SQUARROSA(1031)	MX-TCI	18OMON-UNL	25	17OMON-GAI	25	297	348	522	UKR-OD 952.92/AE.SQUARROSA(1031)	CAWW04GH00061S	-0GH-0SE-030E-8E-0E-1YA-0YM	MX-TCI	16SYNT-PYT-OMSK	95
44	77	2	CIMMYT	Turkey	UKR-OD 1530.94/AE.SQUARROSA(1027)	MX-TCI	18OMON-UNL	77	17OMON-GAI	147	313	446	579	UKR-OD 1530.94/AE.SQUARROSA(1027)	CAWW04GH00078S	-0GH-0SE-030E-7E-0E-1YA-0YM	MX-TCI	16SYNT-PYT-OMSK	96
45	98	2	CIMMYT	Turkey	UKR-OD 1530.94/AE.SQUARROSA(1027)	MX-TCI	18OMON-UNL	98	17OMON-GAI	18	270	415	605	UKR-OD 1530.94/AE.SQUARROSA(1027)	CAWW04GH00078S	-0GH-0SE-030E-11E-0E-1YA-0YM	MX-TCI	16SYNT-PYT-OMSK	98
46	58	2	CIMMYT	Turkey	UKR-OD 1530.94/AE.SQUARROSA(1027)	MX-TCI	18OMON-UNL	58	17OMON-GAI	31	189	434	558	UKR-OD 1530.94/AE.SQUARROSA(1027)	CAWW04GH00078S	-0GH-0SE-030E-7E-0E-2YA-0YM	MX-TCI	16SYNT-PYT-OMSK	100
47	88	1	Japan	Japan	LANGDON/KU-2093	JAP	18OMON-UNL	88	17OMON-GAI	53	174	477	594	LANGDON/KU-2093			JAP	16SYNT-PYT-OMSK	102
48	116	2	CIMMYT	Turkey	UKR-OD 1530.94/AE.SQUARROSA(1027)	MX-TCI	18OMON-UNL	116	17OMON-GAI	139	326	457	625	UKR-OD 1530.94/AE.SQUARROSA(1027)	CAWW04GH00078S	-0GH-0SE-030E-17E-0E-2YA-0YM	MX-TCI	16SYNT-PYT-OMSK	103
49	49	2	CIMMYT	Turkey	UKR-OD 1530.94/AE.SQUARROSA(1027)	MX-TCI	18OMON-UNL	49	17OMON-GAI	65	240	400	548	UKR-OD 1530.94/AE.SQUARROSA(1027)	CAWW04GH00078S	-0GH-0SE-030E-18E-0E-1YA-0YM	MX-TCI	16SYNT-PYT-OMSK	104
51	134	1	Japan	Japan	LANGDON/IG 131606	JAP	18OMON-UNL	134	17OMON-GAI	91	253	387	644	LANGDON/IG 131606			JAP	16SYNT-PYT-OMSK	107
52	33	1	Japan	Japan	LANGDON/KU-2100	JAP	18OMON-UNL	33	17OMON-GAI	107	324	361	530	LANGDON/KU-2100			JAP	16SYNT-PYT-OMSK	108
53	86	1	Japan	Japan	LANGDON/KU-2079	JAP	18OMON-UNL	86	17OMON-GAI	102	194	482	591	LANGDON/KU-2079			JAP	16SYNT-PYT-OMSK	109
55	1	2	CIMMYT	Turkey	AISBERG/AE.SQUARROSA(511)	MX-TCI	18OMON-UNL	1	17OMON-GAI	46	298	391	496	AISBERG/AE.SQUARROSA(511)	CAWW04GH00005S	-0GH-0SE-030E-5E-0E-1YA-0YM	MX-TCI	16SYNT-PYT-OMSK	113
56	128	2	CIMMYT	Turkey	UKR-OD 1530.94/AE.SQUARROSA(1027)	MX-TCI	18OMON-UNL	128	17OMON-GAI	51	232	412	637	UKR-OD 1530.94/AE.SQUARROSA(1027)	CAWW04GH00078S	-0GH-0SE-030E-18E-0E-2YA-0YM	MX-TCI	16SYNT-PYT-OMSK	115
57	4	2	CIMMYT	Turkey	UKR-OD 1530.94/AE.SQUARROSA(392)	MX-TCI	18OMON-UNL	4	17OMON-GAI	88	286	493	499	UKR-OD 1530.94/AE.SQUARROSA(392)	CAWW04GH00071S	-0GH-0SE-030E-7E-0E-1YA-0YM	MX-TCI	16SYNT-PYT-OMSK	116
59	39	2	CIMMYT	Turkey	UKR-OD 1530.94/AE.SQUARROSA(1027)	MX-TCI	18OMON-UNL	39	17OMON-GAI	68	301	341	538	UKR-OD 1530.94/AE.SQUARROSA(1027)	CAWW04GH00078S	-0GH-0SE-030E-9E-0E-2YA-0YM	MX-TCI	16SYNT-PYT-OMSK	128
61	29	2	CIMMYT	Turkey	PANDUR/AE.SQUARROSA(409)	MX-TCI	18OMON-UNL	29	17OMON-GAI	137	207	333	526	PANDUR/AE.SQUARROSA(409)	CAWW04GH00081S	-0GH-0SE-030E-2E-0E-1YA-0YM	MX-TCI	16SYNT-PYT-OMSK	132
62	50	2	CIMMYT	Turkey	UKR-OD 1530.94/AE.SQUARROSA(1027)	MX-TCI	18OMON-UNL	50	17OMON-GAI	116	307	465	550	UKR-OD 1530.94/AE.SQUARROSA(1027)	CAWW04GH00078S	-0GH-0SE-030E-15E-0E-2YA-0YM	MX-TCI	16SYNT-PYT-OMSK	135
63	76	1	Japan	Japan	LANGDON/KU-2092	JAP	18OMON-UNL	76	17OMON-GAI	115	169	340	578	LANGDON/KU-2092			JAP	16SYNT-PYT-OMSK	138
64	22	1	Japan	Japan	LANGDON/KU-2088	JAP	18OMON-UNL	22	17OMON-GAI	54	241	483	519	LANGDON/KU-2088			JAP	16SYNT-PYT-OMSK	146
65	82	1	Japan	Japan	LANGDON/KU-2105	JAP	18OMON-UNL	82	17OMON-GAI	117	281	485	587	LANGDON/KU-2105			JAP	16SYNT-PYT-OMSK	150
66	78	3	USA	USA	RBOT	USA	18OMON-UNL	78	17OMON-GAI	96	222	431	580	RBOT			Canada	16Breeding-PYT-2	1
68	141	3	USA	USA	Linkert	USA-Minnesota	18OMON-UNL	141	17OMON-GAI	126	171	484	651	Linkert		MN-97695-4/ADA,USA	Canada	16Breeding-PYT-2	3
69	115	3	USA	USA	Rollag	USA-Minnesota	18OMON-UNL	115	17OMON-GAI	125	186	373	624	Rollag		MN-95229-40*2/RL-70-4	Canada	16Breeding-PYT-2	4
70	15	4	KASIB	Russia	Serebristaya	Russia	18OMON-UNL	15	17OMON-GAI	165	173	427	510	Serebristaya			Russia	CHECK-2
71	66	3	USA	USA	Sadin	USA	18OMON-UNL	66	17OMON-GAI	85	285	439	566	Sadin			Canada	16Breeding-PYT-2	5
72	123	3	USA	USA	Tom	USA-Minnesota	18OMON-UNL	123	17OMON-GAI	1	172	436	632	Tom		VERDE/SONJA(97-T-1003)//VERDE	Canada	16Breeding-PYT-2	7
73	104	3	USA	USA	Freyr	USA-Agripro	18OMON-UNL	104	17OMON-GAI	114	287	378	612	Freyr		SONJA/VANCE//SUMAI-3/DALEN	Canada	16Breeding-PYT-2	8
74	56	3	USA	USA	Knudson	USA-Montana	18OMON-UNL	56	17OMON-GAI	105	168	395	556	Knudson		KARL/KRONA/3/BERGEN//ERIK/MN-73167[3242]; KARL/KRONA//N-90-0669	Canada	16Breeding-PYT-2	9
75	61	3	USA	USA	Kelby	USA-Agripro	18OMON-UNL	61	17OMON-GAI	3	230	423	561	Kelby		N-97-0117/3/N-92-0098//SUMAI-3/DALEN	Canada	16Breeding-PYT-2	10
76	26	3	USA	USA	Jenna	USA-Agripro	18OMON-UNL	26	17OMON-GAI	142	323	476	523	Jenna		N-98-0178/97-S-0212-08	Canada	16Breeding-PYT-2	11
77	103	3	USA	USA	Brennan	USA-Agripro	18OMON-UNL	103	17OMON-GAI	58	192	464	611	Brennan		REEDER//(N-98-0439)CHINA-SCAB-140/N-90-0690	Canada	16Breeding-PYT-2	12
78	64	3	USA	USA	Alpine	USA-Agripro	18OMON-UNL	64	17OMON-GAI	75	296	487	564	Alpine			Canada	16Breeding-PYT-2	14
79	100	3	USA	USA	SY TYRA	USA-Sungenta	18OMON-UNL	100	17OMON-GAI	79	180	445	607	SY TYRA		CHOTEAU/4*NORPRO	Canada	16Breeding-PYT-2	15
81	53	3	USA	USA	Prevail	USA-S.Dakota	18OMON-UNL	53	17OMON-GAI	2	263	466	553	Prevail		SD-3720/MN-98389-A	Canada	16Breeding-PYT-2	16
82	65	3	USA	USA	Advance	USA-S.Dakota	18OMON-UNL	65	17OMON-GAI	32	277	367	565	Advance		GRANGER/N-98-0230	Canada	16Breeding-PYT-2	17
83	47	4	KASIB	Russia	Lutestsens 79/04-3	Russia	18OMON-UNL	47	17OMON-GAI	26	191	336	546	Lutestsens 79/04-3		Lutestsens 248-97-11/OMSKAYA37	Russia	16PYT-Sr_Ug	28
84	80	4	KASIB	Russia	Lutestsens 220/03-32	Russia	18OMON-UNL	80	17OMON-GAI	121	284	354	585	Lutestsens 220/03-32		Omskaya 37/Omskaya 30	Russia	16PYT-Sr_Ug	29
85	102	4	KASIB	Russia	Lutestsens 310-00-1	Russia	18OMON-UNL	102	17OMON-GAI	141	273	495	610	Lutestsens 310-00-1		Lutestsens L 80 F5(7)//Lutestsens 242-97-2-32/G 90-156-6	Russia	16PYT-Sr_Ug	30
86	109	4	KASIB	Russia	L 656	Russia	18OMON-UNL	109	17OMON-GAI	159	300	356	618	L 656			Russia	16PYT-Sr_Ug	31
87	27	4	KASIB	Russia	L 485	Russia	18OMON-UNL	27	17OMON-GAI	160	292	364	524	L 485			Russia	16PYT-Sr_Ug	32
89	37	4	KASIB	Russia	Aestivum 947	Russia	18OMON-UNL	37	17OMON-GAI	163	309	377	536	Aestivum 947			Russia	16PYT-Sr_Ug	34
91	126	4	KASIB	Russia	Lutestsens 7/04-4	Russia	18OMON-UNL	126	17OMON-GAI	59	317	351	635	Lutestsens 7/04-4		Omskaya 21/Reno//Omskaya 38	Russia	16PYT-Sr_Ug_2	3
92	79	4	KASIB	Russia	Lutestsens 242/97-2-21	Russia	18OMON-UNL	79	17OMON-GAI	86	257	335	583	Lutestsens 242/97-2-21		LUTESCENS-61-89-100/LUTESCENS-350-89-9	Russia	16PYT-Sr_Ug_2	5
93	107	4	KASIB	Russia	Lutestsens 242/97-2-32	Russia	18OMON-UNL	107	17OMON-GAI	84	311	405	616	Lutestsens 242/97-2-32		LUTESCENS-61-89-100/LUTESCENS-350-89-9	Russia	16PYT-Sr_Ug_2	9
94	132	4	KASIB	Russia	Element 22	Russia	18OMON-UNL	132	17OMON-GAI	112	266	422	642	Element 22		ERYTHROSPERMUM 33-97/DUET	Russia	16KASIB	43
95	124	4	KASIB	Russia	Lutestsens 27-12	Russia	18OMON-UNL	124	17OMON-GAI	37	209	458	633	Lutestsens 27-12		LUTESCENS 30-94*2/3/T.DICOCCON PI94625/AE.SQUARROSA (372)//3*PASTOR	Russia	16KASIB	41
96	14	4	KASIB	Russia	Lutestsens 96-12	Russia	18OMON-UNL	14	17OMON-GAI	8	265	438	509	Lutestsens 96-12		LUTESCENS 444/SONATA (F3)	Russia	16KASIB	42
97	136	4	KASIB	Russia	Lutestsens 7/04-10	Russia	18OMON-UNL	136	17OMON-GAI	140	233	425	646	Lutestsens 7/04-10		Uralosibirskaya/Omskaya 38	Russia	16KASIB	36
98	57	4	KASIB	Russia	Lutestsens 186/04-61	Russia	18OMON-UNL	57	17OMON-GAI	150	289	408	557	Lutestsens 186/04-61		ОMSKAYA37 / LUTESCENS 210-99-10	Russia	16KASIB	46
99	71	4	KASIB	Russia	Lutestsens 6/04-4	Russia	18OMON-UNL	71	17OMON-GAI	22	182	397	571	Lutestsens 6/04-4		LUTESCENS 290/97-7 / LUTESCENS 167-98-4	Russia	16KASIB	44
101	135	4	KASIB	Russia	LD-25	Russia	18OMON-UNL	135	17OMON-GAI	6	242	469	645	LD-25		DOBRINYA // TcLr25	Russia	16KASIB	50
102	133	4	KASIB	Russia	Stolypinskaya 2	Russia	18OMON-UNL	133	17OMON-GAI	135	198	345	643	Stolypinskaya 2			Russia	16CYT	1
103	38	4	KASIB	Russia	Lutestsens 15-12	Russia	18OMON-UNL	38	17OMON-GAI	78	229	471	537	Lutestsens 15-12		SIBAKOVSKAYA YUBILEYNAYA/3/EMB16/CBRD//CBRD/4/27.90.98.3	Russia	16PYT-CSE	7
104	105	4	KASIB	Russia	Lutestsens 87-12	Russia	18OMON-UNL	105	17OMON-GAI	95	308	467	614	Lutestsens 87-12		KAZAKHSTANSKAYA-25/2*ATTILA/3/T.DICOCCON PI94625/AE.SQUARROSA (372)//3*PASTOR/4/OMSKAYA 37	Russia	16PYT-CSE	6
105	70	4	KASIB	Russia	Pamyati Leontyeva	Russia	18OMON-UNL	70	17OMON-GAI	28	305	462	570	Pamyati Leontyeva			Russia	16CYT	8
106	3	4	KASIB	Russia	Lutestsens 88-13	Russia	18OMON-UNL	3	17OMON-GAI	80	320	470	498	Lutestsens 88-13		LUTESCENS 30-94*2/3/T.DICOCCON PI94625/AE.SQUARROSA (372)//3*PASTOR	Russia	16PYT-CSE	14
107	48	4	KASIB	Russia	Lutestsens 23-12	Russia	18OMON-UNL	48	17OMON-GAI	20	176	475	547	Lutestsens 23-12		LONG91-1211/PASTOR/3/EMB16/CBRD//CBRD/4/TERTSIYA	Russia	16PYT-CSE	16
108	13	4	KASIB	Russia	Lutestsens 124-13	Russia	18OMON-UNL	13	17OMON-GAI	143	188	406	508	Lutestsens 124-13		BVXIAOBINGMAI (T.AT)/MILAN/5/CHEN/AE.SQ//2*WEAVER/3/BAV92/4/ JARU /6 /EMB16 / CBRD//CBRD	Russia	16PYT-CSE	19
109	2	4	KASIB	Russia	Lutestsens 90-12	Russia	18OMON-UNL	2	17OMON-GAI	67	178	388	497	Lutestsens 90-12		TERCIYA/NIVA2	Russia	16PYT-CSE	15
111	52	4	KASIB	Russia	Lutestsens 16-14	Russia	18OMON-UNL	52	17OMON-GAI	90	224	352	552	Lutestsens 16-14		Aestivum 887	Russia	16PYT-CSE	22
112	35	4	KASIB	Russia	Lutestsens 15-14	Russia	18OMON-UNL	35	17OMON-GAI	40	170	398	534	Lutestsens 15-14		Lutescens 987	Russia	16PYT-CSE	23
113	97	4	KASIB	Russia	Pavlogradka	Russia	18OMON-UNL	97	17OMON-GAI	10	201	365	604	Pavlogradka		AKTYUBINSKAYA-91/ALTAISKAYA-50	Russia	16PYT	30
114	74	4	KASIB	Russia	OmGAU-90	Russia	18OMON-UNL	74	17OMON-GAI	87	228	488	574	OmGAU-90		ERYTHROSPERMUM-59/TERTSIYA//ERYTHROSPERMUM-59	Russia	16PYT	9
115	12	4	KASIB	Russia	Tyumenskaya Yubileynaya	Russia	18OMON-UNL	12	17OMON-GAI	120	193	355	507	Tyumenskaya Yubileynaya			Russia	KASIB-BW-2017	46
116	55	4	KASIB	Russia	Uralosibirskaya	Russia	18OMON-UNL	55	17OMON-GAI	93	321	386	555	Uralosibirskaya		LUTESCENS-13-93-133/KAZANSKAYA-YUBILEINAYA	Russia	6KASIB	34
117	117	4	KASIB	Russia	Omskaya 36	Russia	18OMON-UNL	117	17OMON-GAI	12	299	337	626	Omskaya 36		LUTESCENS-150-86-10/RUNAR	Russia	16EYT	3
118	8	4	KASIB	Russia	Omskaya 35	Russia	18OMON-UNL	8	17OMON-GAI	136	208	376	503	Omskaya 35		OMSKAYA-29/OMSKAYA-30	Russia	16KASIB	29
119	59	4	KASIB	Russia	Duet	Russia	18OMON-UNL	59	17OMON-GAI	49	202	353	559	Duet		ERYTHROSPERMUM-59//TSELINNAYA-20/ANK-102	Russia	16PYT	8
120	19	4	KASIB	Russia	Pamyati Azieva	Russia	18OMON-UNL	19	17OMON-GAI	36	187	334	514	Pamyati Azieva		SARATOVSKAYA-29/LUTESCENS-99-80-1	Russia	CHECK-1
121	119	4	KASIB	Russia	Novosibirskaya 18	Russia	18OMON-UNL	119	17OMON-GAI	64	255	440	628	Novosibirskaya 18		KANTEGIRSKAYA-89/5/(12-1)BEZENCHUKSKAYA-98/SKALA//IRTYSHANKA-10/3/NOVOSIBIRSKAYA-22/4/LUTESCENS-101/KRASNOYARSKAYA	Russia	16KASIB	39
122	45	4	KASIB	Russia	Tobolskaya	Russia	18OMON-UNL	45	17OMON-GAI	11	322	489	544	Tobolskaya		LUTESCENS-123-S/OMSKAYA-20	Russia	16KASIB	26
123	42	4	KASIB	Russia	Sibirskiy Alyans	Russia	18OMON-UNL	42	17OMON-GAI	156	250	410	541	Sibirskiy Alyans		LUTESCENS-281/(USA)K-54975//LUTESCENS-281	Russia	10KASIB	34
124	24	4	KASIB	Kazakhstan	Stepnaya 245	Kazakhstan	18OMON-UNL	24	17OMON-GAI	133	249	404	521	Stepnaya 245		Steрnaya 16 /Berkut // Аktube 39	Kazakhstan	KASIB-BW-2017	1
125	41	4	KASIB	Kazakhstan	Stepnaya 253	Kazakhstan	18OMON-UNL	41	17OMON-GAI	14	197	349	540	Stepnaya 253		Lutestsens С-2207 / Stepnaya 60	Kazakhstan	KASIB-BW-2017	2
126	129	4	KASIB	Kazakhstan	Stepnaya 259	Kazakhstan	18OMON-UNL	129	17OMON-GAI	66	185	414	638	Stepnaya 259		Saratovskaya 29 / Stepnaya 62	Kazakhstan	KASIB-BW-2017	3
127	63	4	KASIB	Kazakhstan	GVK 2127	Kazakhstan	18OMON-UNL	63	17OMON-GAI	127	237	383	563	GVK 2127		VK 4583 (GVK 1860-12) / Tselinnaya 3с	Kazakhstan	KASIB-BW-2017	4
128	143	4	KASIB	Kazakhstan	GVK 2161	Kazakhstan	18OMON-UNL	143	17OMON-GAI	103	216	358	653	GVK 2161		VK 4450 (Lutestsens 20 / Lada)	Kazakhstan	KASIB-BW-2017	5
129	75	4	KASIB	Kazakhstan	Lyutestsens 857	Kazakhstan	18OMON-UNL	75	17OMON-GAI	55	260	394	576	Lyutestsens 857		Omskaya 18 / Lutestsens 32	Kazakhstan	KASIB-BW-2017	6
131	108	4	KASIB	Kazakhstan	Lutestsens 932	Kazakhstan	18OMON-UNL	108	17OMON-GAI	97	196	450	617	Lutestsens 932		Eritrospermum 287 / Kazakhstanskaya 17	Kazakhstan	KASIB-BW-2017	7
132	114	4	KASIB	Kazakhstan	Lutestsens 248/01	Kazakhstan	18OMON-UNL	114	17OMON-GAI	27	283	468	623	Lutestsens 248/01		Eritrospermum 893 / Tselinogradka	Kazakhstan	KASIB-BW-2017	8
133	142	4	KASIB	Kazakhstan	Lutestsens 393/05	Kazakhstan	18OMON-UNL	142	17OMON-GAI	24	210	389	652	Lutestsens 393/05		Karabalykskaya 90 / 90-6	Kazakhstan	KASIB-BW-2017	9
134	40	4	KASIB	Kazakhstan	Liniya 4-10-16	Kazakhstan	18OMON-UNL	40	17OMON-GAI	77	184	379	539	Liniya 4-10-16		Molodeznaya / Mironovskaya 808	Kazakhstan	KASIB-BW-2017	10
135	84	4	KASIB	Kazakhstan	Liniya 22 ChS	Kazakhstan	18OMON-UNL	84	17OMON-GAI	69	235	344	589	Liniya 22 ChS		(LUTESCENS 424/4/MILAN/SHA7/3/CROC_1/AE.SQUARROSA (224)//OPATA/5/GLE)	Kazakhstan	KASIB-BW-2017	11
136	89	4	KASIB	Kazakhstan	Lutestsens 48-204-03	Kazakhstan	18OMON-UNL	89	17OMON-GAI	81	199	433	595	Lutestsens 48-204-03		Lutestsens 4 / Bashkirskaya 20	Kazakhstan	KASIB-BW-2017	12
137	83	4	KASIB	Kazakhstan	Lutestsens 2028	Kazakhstan	18OMON-UNL	83	17OMON-GAI	30	179	456	588	Lutestsens 2028		Lutestsens 253-93-4 / Karagandnskaya 21	Kazakhstan	KASIB-BW-2017	13
138	90	4	KASIB	Kazakhstan	Lutestsens 2102	Kazakhstan	18OMON-UNL	90	17OMON-GAI	128	291	472	596	Lutestsens 2102		Lutestsens 1085 / Omskaya 18	Kazakhstan	KASIB-BW-2017	14
139	94	4	KASIB	Russia	Lutestsens 30	Russia	18OMON-UNL	94	17OMON-GAI	38	227	338	601	Lutestsens 30		Pavlodarskaya 93 / WH 007850 ZAK (WA 7850)	Russia	KASIB-BW-2017	15
141	147	4	KASIB	Russia	Lutestsens 65	Russia	18OMON-UNL	147	17OMON-GAI	155	190	437	657	Lutestsens 65		Lutestsens 44 / UK-3 (Korea)	Russia	KASIB-BW-2017	16
142	149	4	KASIB	Russia	Lutestsens 261	Russia	18OMON-UNL	149	17OMON-GAI	57	302	370	659	Lutestsens 261		Lutestsensс 337-77-44 / Mironovskaya 808 (РНВ)	Russia	KASIB-BW-2017	17
143	5	4	KASIB	Russia	Lutestsens 1103	Russia	18OMON-UNL	5	17OMON-GAI	94	244	339	500	Lutestsens 1103		Svetlanka /Aleksandrina	Russia	KASIB-BW-2017	26
144	9	4	KASIB	Russia	Eritrospermum 1119	Russia	18OMON-UNL	9	17OMON-GAI	129	310	416	504	Eritrospermum 1119		Omskaya 28 / Saratovskaya 71	Russia	KASIB-BW-2017	27
145	92	4	KASIB	Russia	Lutestsens 8-108-1	Russia	18OMON-UNL	92	17OMON-GAI	157	211	419	599	Lutestsens 8-108-1		Selections SPChS 8 №108	Russia	KASIB-BW-2017	28
146	32	4	KASIB	Russia	Lutestsens 22-17	Russia	18OMON-UNL	32	17OMON-GAI	41	217	454	529	Lutestsens 22-17		Tertsiya/Zhigulevskaya	Russia	KASIB-BW-2017	29
147	93	4	KASIB	Russia	Lutestsens 37-17	Russia	18OMON-UNL	93	17OMON-GAI	131	303	362	600	Lutestsens 37-17		Lubava 2/Proxorovka	Russia	KASIB-BW-2017	30
148	125	4	KASIB	Russia	Lutestsens KS 14/09-2	Russia	18OMON-UNL	125	17OMON-GAI	148	183	474	634	Lutestsens KS 14/09-2		Omskaya 32 /Sonata	Russia	KASIB-BW-2017	31
149	34	4	KASIB	Russia	Lutestsens KS 140/08-3	Russia	18OMON-UNL	34	17OMON-GAI	152	251	459	531	Lutestsens KS 140/08-3		Omskaya 37 / Salavat Ulaev	Russia	KASIB-BW-2017	32
151	138	4	KASIB	Russia	Lutestsens KS 963	Russia	18OMON-UNL	138	17OMON-GAI	119	215	418	648	Lutestsens KS 963		Tulaikovskaya 10 / Ekada 6	Russia	KASIB-BW-2017	33
152	36	4	KASIB	Russia	Lutestsens 1296	Russia	18OMON-UNL	36	17OMON-GAI	21	212	442	535	Lutestsens 1296		AC Karma/Zemlyachka	Russia	KASIB-BW-2017	35
153	18	4	KASIB	Russia	Lutestsens 1300	Russia	18OMON-UNL	18	17OMON-GAI	113	234	441	513	Lutestsens 1300		Tulaikovskaya 10/ Zemlyachka	Russia	KASIB-BW-2017	36
154	111	4	KASIB	Russia	Sibirskaya 21	Russia	18OMON-UNL	111	17OMON-GAI	132	258	413	620	Sibirskaya 21		(Novosibirskaia 67 х Udacha) х Sibirskaya 17	Russia	KASIB-BW-2017	37
155	11	4	KASIB	Russia	Novosibirskaya 16	Russia	18OMON-UNL	11	17OMON-GAI	19	236	363	506	Novosibirskaya 16		Pamyati Vavenkova * Novosibirskaya 15	Russia	KASIB-BW-2017	38
156	127	4	KASIB	Russia	Novosibirskaya 41	Russia	18OMON-UNL	127	17OMON-GAI	76	288	452	636	Novosibirskaya 41		(Tumenskaya 80*[(Tselinnaya 20 * ANK 102)]F1*Sport	Russia	KASIB-BW-2017	39
157	20	4	KASIB	Russia	OmGAU-100	Russia	18OMON-UNL	20	17OMON-GAI	42	314	346	517	OmGAU-100		Lutestsens 444 х Eritrospermum 59	Russia	KASIB-BW-2017	41
158	7	4	KASIB	Russia	Lut. 3/04-21-11	Russia	18OMON-UNL	7	17OMON-GAI	44	214	494	502	Lut. 3/04-21-11		Lutestsens 290/97-7 / 292(32) Tam200/Tut(4)	Russia	KASIB-BW-2017	43
159	60	4	KASIB	Russia	Lut. 79/04-11	Russia	18OMON-UNL	60	17OMON-GAI	109	219	480	560	Lut. 79/04-11		Lutestsens 248-97-11 / Omskaya 38	Russia	KASIB-BW-2017	44
161	69	4	KASIB	Russia	SPChS 69	Russia	18OMON-UNL	69	17OMON-GAI	13	248	417	569	SPChS 69		ALT 530/3/EMB16/CBRD//CBRD/4/LUT 210.99.10	Russia	KASIB-BW-2017	45
162	21	4	KASIB	Russia	Eritrospermum 59	Russia	18OMON-UNL	21	17OMON-GAI	70	275	432	518	Eritrospermum 59		CHAIKA,UKR / IRTYSHANKA-10	Russia	16PYT	31
163	17	4	KASIB	Russia	Tyumenochka	Russia	18OMON-UNL	17	17OMON-GAI	89	177	411	512	Tyumenochka		(Skala х Tumenskaya 80) хOmskaya 32) (ГАУ Северного Зауралья Тюмень)	Russia	KASIB-BW-2017	47
164	139	4	KASIB	Russia	Silach	Russia	18OMON-UNL	139	17OMON-GAI	33	252	473	649	Silach		Lutestsens 210/99-10 х Eritrospermum 23090	Russia	KASIB-BW-2017	50
165	145	4	KASIB	Russia	Eritrospermum 24841	Russia	18OMON-UNL	145	17OMON-GAI	92	294	403	655	Eritrospermum 24841		Chelyaba 75 х ANK-17В	Russia	KASIB-BW-2017	51
